# Supplementary material for: Differentially expressed microRNAs in exosomes of patients with breast cancer revealed by next-generation sequencing
Source: PubMed Central journal article supplement — Oncol Rep. 2019 Nov 6;43(1):240–50. doi: 10.3892/or.2019.7401 (PMC6908931; doi:10.3892/or.2019.7401), 2019-11-06
Supplement: Supplementary_Data.pdf [file Supplementary_Data.pdf]

Table S1. Clinical information of the breast cancer patients and healthy controls.

| Characteristics      | RNA sequence analysis  |                                |                       |                       |                  |                | qPCR validation     |                 |  |
|----------------------|------------------------|--------------------------------|-----------------------|-----------------------|------------------|----------------|---------------------|-----------------|--|
|                      | Basal-like group (n=6) | Her-2 <sup>+</sup> group (n=6) | Luminal A group (n=3) | Luminal B group (n=6) | TNBC group (n=6) | HC group (n=3) | TNBC group (n=20)   | HC group (n=20) |  |
|                      |                        |                                |                       |                       |                  |                |                     |                 |  |
| Age (years)          | 50.33±15.77            | 50.33±6.83                     | 49.33±6.03            | 45.67±7.76            | 54.67±10.65      | 47.00±6.08     | 47.50±10.15         | 51.25±7.95      |  |
| Stage                | II:III:IV=2:1:3        | II:III=3:3                     | II:III=2:1            | II:III:IV=1:1:4       | I:II:III=1:4:1   | -              | I:II:III:IV=3:8:4:5 | -               |  |
| ER status (positive) | 0 (0%)                 | 0 (0%)                         | 2 (66.67%)            | 3 (50.0%)             | 0 (0%)           | -              | 0 (0%)              | -               |  |
| PR status (positive) | 0 (0%)                 | 0 (0%)                         | 2 (66.67%)            | 4 (66.67%)            | 0 (0%)           | -              | 0 (0%)              | -               |  |
| Hypertension         | 0 (0%)                 | 2 (33.33%)                     | 1 (33.33%)            | 0 (0%)                | 1 (16.67%)       | 0 (0%)         | 3 (15.0%)           | 4 (20.0%)       |  |
| Diabetes             | 1 (16.67%)             | 1 (16.67%)                     | 1 (33.33%)            | 0 (0%)                | 0 (0%)           | 0 (0%)         | 1 (5.0%)            | 2 (10.0%)       |  |
| Hyperlipidemia       | 0 (0%)                 | 0 (0%)                         | 0 (0%)                | 0 (0%)                | 0 (0%)           | 0 (0%)         | 1 (5.0%)            | 6 (30.0%)       |  |
| CA15-3, U/ml         | 90.017±146.447         | 13.150±5.468                   | 13.367±16.051         | 18.467±17.211         | 14.400±9.737     | 3.200±0.400    | 23.758±2.536        | 9.093±5.485     |  |
| CEA, ng/ml           | 20.913±40.791          | 2.730±1.292                    | 7.390±9.051           | 3.728±5.537           | 1.930±1.348      | 1.510±0.312    | 2.536±4.225         | 1.811±0.834     |  |
| Ferritin, ng/ml      | 293.465±234.648        | 405.652±205.862                | 68.850±29.914         | 101.732±90.838        | 189.815±133.199  | 44.733±10.588  | -                   | -               |  |
| β-HCG, mIU/ml        | 0.500±0.200            | 1.452±1.508                    | 0.400±0.173           | 0.700±0.352           | 1.178±0.681      | 0.927±0.162    | -                   | -               |  |
| TG, mmol/l           | 5.093±0.494            | 5.210±0.658                    | 4.800±1.262           | 5.292±1.297           | 5.093±0.711      | 4.290±0.790    | 5.518±1.183         | 4.845±1.391     |  |
| TC, mmol/l           | 1.500±0.904            | 1.357±0.778                    | 0.797±0.035           | 0.902±0.353           | 1.680±1.055      | 1.167±0.179    | 1.660±0.653         | 2.082±2.552     |  |
| HDL-C, mmol/l        | 1.300±0.249            | 1.497±0.306                    | 1.707±0.240           | 1.588±0.290           | 1.432±0.342      | 1.213±0.219    | 1.362±0.330         | 1.388±0.341     |  |
| LDL-C, mmol/l        | 2.940±0.727            | 2.913±0.373                    | 2.500±0.893           | 3.093±1.241           | 2.817±0.386      | 2.537±0.179    | 3.234±0.887         | 2.610±1.069     |  |

HC, healthy control; TNBC, triple-negative breast cancer; CA15-3, carbohydrate antigen 15-3; CEA, carcinoembryonic antigen; HCG, human chorionic gonadotropin; TG, triglycerides; TC, total cholesterol; LDL-C, low-density lipoprotein cholesterol; HDL-C, high-density lipoprotein cholesterol.

Table SII. Overall situation of the sequencing data.

| Subtype    | Sample | Total reads | Q30 (%) | Clean reads | Mapped genome miRNA | Mapped known mature | Mapped known total miRNA |
|------------|--------|-------------|---------|-------------|---------------------|---------------------|--------------------------|
| Basal-like | BN1    | 13,331,966  | 93.72   | 12,661,357  | 6,222,085           | 6,222,085           | 977                      |
|            | BN2    | 13,541,822  | 93.58   | 12,860,608  | 758,775             | 8,342,033           | 790                      |
|            | BN3    | 14,647,152  | 93.72   | 13,970,543  | 9,792,136           | 9,792,136           | 1,020                    |
|            | BR1    | 12,747,814  | 93.12   | 12,019,593  | 6,625,029           | 6,625,029           | 964                      |
|            | BR2    | 11,341,605  | 91.44   | 10,701,883  | 1,548,099           | 6,174,566           | 909                      |
|            | BR3    | 11,600,378  | 91.54   | 10,909,679  | 5,963,147           | 6,498,789           | 1,017                    |
| HER-2+     | HN1    | 15,417,590  | 94.80   | 14,517,814  | 9,407,343           | 9,407,343           | 977                      |
|            | HN2    | 11,931,617  | 91.48   | 11,205,489  | 6,188,178           | 6,522,751           | 852                      |
|            | HN3    | 14,320,374  | 91.67   | 13,593,315  | 8,246,739           | 8,246,739           | 1,031                    |
|            | HR1    | 14,220,831  | 93.13   | 13,192,134  | 7,428,747           | 7,428,747           | 1,066                    |
|            | HR2    | 13,690,196  | 97.83   | 13,229,847  | 10,379,595          | 10,379,595          | 673                      |
|            | HR3    | 12,134,154  | 91.44   | 11,450,051  | 1,800,160           | 6,394,946           | 955                      |
| Luminal A  | LA1    | 11,713,338  | 92.30   | 10,989,341  | 5,727,728           | 5,727,728           | 900                      |
|            | LA2    | 11,472,001  | 91.42   | 10,767,391  | 6,622,095           | 6,622,095           | 953                      |
|            | LA3    | 15,067,616  | 91.13   | 14,050,990  | 8,634,222           | 8,634,222           | 1,000                    |
| Luminal B  | LN1    | 11,839,975  | 92.33   | 11,059,810  | 5,922,966           | 5,922,966           | 971                      |
|            | LN2    | 12,327,522  | 91.68   | 11,653,968  | 152,115             | 6,645,275           | 932                      |
|            | LN3    | 14,313,723  | 93.45   | 13,564,273  | 8,869,285           | 8,869,285           | 950                      |
|            | LR1    | 13,117,572  | 94.59   | 12,441,898  | 6,775,954           | 6,775,954           | 1,074                    |
|            | LR2    | 14,219,172  | 93.92   | 13,461,417  | 8,937,593           | 8,937,593           | 805                      |
|            | LR3    | 14,207,546  | 95.39   | 13,437,766  | 9,593,294           | 9,593,294           | 836                      |
| TNBC       | TN1    | 12,825,265  | 93.07   | 12,189,260  | 6,563,108           | 6,563,108           | 961                      |
|            | TN2    | 12,246,032  | 92.23   | 11,511,210  | 6,863,815           | 6,863,815           | 876                      |
|            | TN3    | 13,406,552  | 94.01   | 12,877,657  | 578,078             | 8,465,949           | 745                      |
|            | TR1    | 12,434,001  | 92.39   | 11,587,403  | 6,216,282           | 6,216,282           | 919                      |
|            | TR2    | 13,272,109  | 91.89   | 12,418,512  | 2,093,981           | 8,061,634           | 829                      |
|            | TR3    | 13,646,652  | 91.39   | 12,751,482  | 1,809,416           | 7,171,377           | 823                      |
| HC         | HC1    | 12,516,111  | 92.40   | 11,113,923  | 5,634,796           | 5,634,796           | 668                      |
|            | HC2    | 13,907,950  | 91.91   | 13,134,382  | 8,153,275           | 8,153,275           | 971                      |
|            | HC3    | 14,316,379  | 91.77   | 13,465,764  | 7,752,683           | 7,752,683           | 944                      |

HER-2, human epidermal growth factor receptor-2; TNBC, triple-negative breast cancer; HC, healthy control.

Table SIII. List of miRNAs found to be differentially expressed between TNBC patients and HCs.

| miRNAs           | Log <sub>2</sub> FC | P-value |
|------------------|---------------------|---------|
| Downregulation   |                     |         |
| hsa-miR-483-5p   | -3.9840             | 0.0003  |
| hsa-miR-490-3p   | -3.2004             | 0.0066  |
| hsa-miR-1250-5p  | -2.8505             | 0.0271  |
| hsa-miR-4665-5p  | -2.9013             | 0.0273  |
| hsa-miR-148a-5p  | -2.3689             | 0.0284  |
| hsa-miR-3620-5p  | -3.7847             | 0.0291  |
| hsa-miR-3928-3p  | -2.8148             | 0.0291  |
| hsa-miR-378a-3p  | -2.5487             | 0.0302  |
| hsa-miR-7110-5p  | -4.0376             | 0.0302  |
| hsa-miR-122-5p   | -2.3101             | 0.0311  |
| hsa-miR-210-3p   | -2.3713             | 0.0311  |
| hsa-miR-22-3p    | -2.4360             | 0.0311  |
| hsa-miR-320a     | -2.8459             | 0.0311  |
| hsa-miR-3591-3p  | -2.3098             | 0.0311  |
| hsa-miR-378c     | -2.6547             | 0.0311  |
| hsa-miR-5187-5p  | -2.6634             | 0.0311  |
| novel_136        | -2.9586             | 0.0322  |
| hsa-miR-1299     | -2.5060             | 0.0358  |
| hsa-miR-3175     | -2.7338             | 0.0360  |
| hsa-miR-3198     | -3.1701             | 0.0360  |
| hsa-miR-4433a-5p | -2.5945             | 0.0389  |
| hsa-miR-4433b-3p | -2.5915             | 0.0389  |
| hsa-miR-4470     | -2.8356             | 0.0398  |
| hsa-miR-769-5p   | -2.2977             | 0.0398  |
| hsa-miR-34a-5p   | -2.0256             | 0.0468  |
| hsa-miR-4646-5p  | -3.8800             | 0.0468  |
| hsa-miR-4667-5p  | -3.2829             | 0.0468  |
| hsa-miR-6724-5p  | -3.4145             | 0.0468  |
| novel_85         | -3.0230             | 0.0468  |
| novel_90         | -3.9641             | 0.0468  |
| hsa-miR-185-3p   | -1.9976             | 0.0480  |
| hsa-miR-378d     | -2.4216             | 0.0483  |
| hsa-miR-6763-5p  | -3.4658             | 0.0483  |
| hsa-miR-7845-5p  | -3.8334             | 0.0483  |
| Up-regulation    |                     |         |
| hsa-miR-150-5p   | 4.6930              | <0.001  |
| hsa-miR-664a-3p  | 4.8060              | 0.0002  |
| hsa-miR-342-3p   | 3.0973              | 0.0059  |
| hsa-miR-374b-5p  | 3.2359              | 0.0095  |
| hsa-miR-374c-3p  | 3.2341              | 0.0095  |
| hsa-miR-155-5p   | 2.7868              | 0.0273  |
| hsa-miR-576-5p   | 3.2565              | 0.0291  |
| hsa-miR-889-3p   | 2.4883              | 0.0291  |
| hsa-miR-23b-3p   | 2.3769              | 0.0311  |
| hsa-miR-361-5p   | 2.8404              | 0.0311  |
| hsa-miR-379-3p   | 3.5850              | 0.0311  |
| hsa-miR-654-3p   | 2.1065              | 0.0311  |
| hsa-miR-30c-5p   | 2.3318              | 0.0389  |
| hsa-miR-411-3p   | 3.6379              | 0.0389  |
| hsa-miR-655-3p   | 3.0701              | 0.0445  |
| hsa-miR-429      | 3.1438              | 0.0468  |
| hsa-miR-668-3p   | 3.8973              | 0.0468  |
| hsa-miR-95-3p    | 2.8315              | 0.0468  |
| hsa-miR-369-3p   | 2.4143              | 0.0483  |
| hsa-miR-92a-3p   | 2.2695              | 0.0483  |

TNBC, triple negative breast cancer; HC, healthy control; FC, Fold-change.
